# Supplementary material
Source: PubMed Central journal article supplement (PMC6187165)
Supplement: pnas.1802610115.sapp.pdf [file pnas.1802610115.sapp.pdf]

## Supplementary Information for

### **Versatility of multivalent orientation, inverted meiosis and rescued fitness in holocentric chromosomal hybrids**

Vladimir A. Lukhtanov, Vlad Dincă, Magne Friberg, Jindra Šichová, Martin Olofsson, Roger Vila, František Marec and Christer Wiklund

**Corresponding Authors:** Vladimir A. Lukhtanov ([lukhtanov@mail.ru](mailto:lukhtanov@mail.ru)) and Christer Wiklund ([Christer.Wiklund@zoologi.su.se](mailto:Christer.Wiklund@zoologi.su.se))

#### **This PDF file includes:**

- SI Methods
- SI Text 1
- SI Text 2
- Figures S1 to S4
- Tables S1 to S8

#### **Other supplementary materials for this manuscript include the following:**

- SI Video
- Caption for SI Video

## SI Methods

**Experimental design.** Given the existence of a triplet of externally virtually indistinguishable species (*L. reali*, *L. sinapis* and *L. juvernica*), the *Leptidea sinapis* specimens used as founders for the laboratory lines were identified based on genitalia examination and/or DNA barcoding. DNA barcodes were obtained using standard protocols (1, 2).

Two main laboratory lines were established based on wild-caught individuals. One was representative for *L. sinapis* populations with high chromosome number ( $2n=106, 108$ ) (3) and included specimens originating from north-eastern Spain (Montseny area, Barcelona province, Catalonia). The other laboratory line was representative for *L. sinapis* populations with low chromosome number ( $2n=57, 58$ ) (this study, Table S1) and included specimens originating from south central Sweden (two field sites in the vicinity of Stockholm). All mating experiments carried out in this study were performed under laboratory conditions at the Department of Zoology, Stockholm University, Sweden.

Pure Spanish and Swedish laboratory lines were maintained and used as controls with respect to crossed lines between male Spanish and female Swedish and female Spanish and male Swedish *L. sinapis*. All possible mating combinations between Spanish and Swedish *L. sinapis* were performed until  $F_2$ , and each mating combination was represented by at least five cases (i.e. at least five different pairs of specimens mated for each combination). The offspring of these pairs were bred to adults and used for further experiments (Fig. 1 in the main text, Fig. S1, Table S2). For generations  $F_3$  and  $F_4$ , a subset of the potential hybrid mating combinations were performed, and the pure lines were stopped.

The laboratory mating protocol followed that described in (2, 4).

Each mating trial started with a virgin female being transferred to an empty cage (0.8 x 0.8 x 0.5 m) that was located underneath 400W metal halide lamps next to a window, letting in additional, natural daylight. The female was fed a 25% sugar solution for 10 minutes, before a male was released into the cage. Courtship initiation was mediated by manipulating males and females into sitting on different cotton tipped sticks. The female was thereafter presented to the male, which often responded by climbing over to the female cotton tip, uncoiling his proboscis and initiating the display by oscillating the proboscis (see the Supplementary Video, as well as (4, 5) for a detailed description of the courtship). After termination of copula females were transferred to individual egg-laying jars (0.5 L) covered with a fine net, that were placed in a quiet egg-laying room with a light

regime of 9:15 h light/dark and room temperature. Females were fed from soaked cotton tips a 25% sugar solution once a day throughout the experiment.

The number of eggs laid by each female on, or in close vicinity to the host plant (a fraction of eggs were sometimes laid on the walls of the pot or upper net), as well as the number of hatched larvae and emerged adults, were recorded. The offspring of parental generation females were reared in family groups of 3-5 individuals in 0.5 L jars with *ad libitum* access to one of their main larval host plants, *Lotus corniculatus* (6, 7). Larvae were reared at 23°C in a 22:2 light/dark cycle to induce direct development into adulthood. We considered as “adults” all individuals that reached the ultimate larval instar. This was done in order to include the last instar larvae that appeared perfectly healthy, but were sacrificed for karyological analyses. A number of (larval and adult) offspring from each mating combination was sacrificed for karyological studies (Table S1). Apart from the sacrificed larvae, the vast majority of last-instar larvae successfully pupated and adults emerged. Adult specimens were sexed and their dry weight measured using a Sauter Automatic Balance (AR 1014).

Emerging adults were sexed and individually marked with a marker pen on the ventral side of the right hind wing. Males were placed in species-specific flight cages at room temperature, whereas females were transferred into a cold room (10 °C) until they were used for further mating experiments. The above process was reiterated across forthcoming generations (until F<sub>2</sub> for within-population crosses, until larval generation F<sub>4</sub> for a subset of hybrid crosses, see Fig. 1 in the main text and Fig. S1).

**Statistical analyses.** All statistical analyses were performed in the statistical software R (R development core team), in a series of linear models, mixed-models and non-parametric tests aimed at exploring the impact of origin (hybrid/pure line) and generation (typically F<sub>1</sub>-F<sub>4</sub>) on a set of fitness variables.

The female mating propensity (yes/no) was tested in generalized linear models (binomial distribution), with logit as link function. First we included data only for the original cross and tested the effect of female population (C/S), male population (CS) and their interaction. Thereafter, we tested the effect of individual cross types across generations (parental - F<sub>3</sub>; see Fig. 3 in the main text). The female time to acceptance (log transformed) was tested in a similar scheme using linear models (ANOVA II) (see Fig. 3 in the main text).

The survival analysis included three separate response variables; survival from egg-larva identifying effects of larval origin (hybrid or pure-line) on larval hatch rate, survival from larva to adult identifying potential consequences of hybrid survival during larvalhood, and the total fitness (measured as survival from egg-adult). First, however, we made sure that larval survival was not affected by (i) the fact that 9 of 27 matings within the pure lines of the paternal and  $F_1$  cross were sibling matings (Table S4) and (ii) that some of the  $F_1$  females laid substantial numbers of eggs on the jar wall and on the net that capped the jar (linear regression hatch rate vs. proportion of eggs laid off host;  $R^2=0.021$ ,  $F_{1,30}=0.64$ ,  $P=0.43$ ). Thereafter, we continued to analyze the fitness data using maternal family as the statistical unit, comparing larger-level effects of cross type and offspring generation. Because data on pure lines were available only for generation  $F_1$  and  $F_2$ , whereas data on hybrid fitness were available also for generation  $F_3$  and  $F_4$ , we applied two different sets of linear models (ANOVA II). First, we included data only from generation  $F_1$  and  $F_2$  and tested the effect of cross type (pure/hybrid) generation ( $F_1/F_2$ ) and their interaction on three survival rates (egg-larva, larva-adult, egg-adult), sex ratio (proportion males) and on female fecundity. In a similar analysis, with the same response variables, we compared fitness among the four hybrid generations ( $F_1$ - $F_4$ ), to detect whether differences established between  $F_1$  and  $F_2$  crosses were maintained in the hybrid lineages. The proportional variables were arcsine-square root transformed, and the number of eggs was log-transformed prior to analysis to approach normality and homogeneity of variances. Post-hoc testing was done with Tukey's HSD tests.

We chose the linear modelling approach over the use of mixed model generalized linear modelling (glmm), because the latter approach could potentially be affected by the variation in the number of samples (e.g. eggs, larvae) coming from each different mother. Hence, when comparing hybrid and pure lines among generations the linear modelling could be seen as a more conservative approach. However, confirming analyses were performed also using the glmm-approach, and these provided qualitatively very similar results (Tables S7 and S8). In that set of models, we used the survival from egg to larva (dead=0, alive=1), survival from larva to adult, survival from egg to adult, and sex of the eclosing adult (female = 0, male =1) as binomially distributed response variables, respectively. In each model the cross type (pure line or hybrid), the offspring generation ( $F_1$ ,  $F_2$ ) and their interaction were used as fixed factors, the larval family was used as a random factor, and logit was used as link function. Thereafter, we compared the survival and sex across all four hybrid generations ( $F_1$ - $F_4$ ) using the same set of response variables in similar glmm models. Models were applied using the R package lme4 (8) and the resulting  $P$ -values were estimated through analysis of

deviance using the function `Anova (model)` in the R package `car` (9). Within the  $F_1$  and  $F_2$  generations, we also applied glmm-modelling to attempt a deeper analysis of the importance of cross direction for fitness. There were two hybrid lines in generation  $F_1$  (crosses between Spanish females and Swedish males (C x S) or between Swedish females and Spanish males (S x C)), and four hybrid lines in generation  $F_2$  (CS x CS, CS x SC; SC x CS and SC x SC), depending on the origin of the grandparents in each cross (Fig. S1). The cross types and the pure lines ( $F_1$ : S x S, C X C;  $F_2$ : CC x CC, SS x SS) were used as fixed factors in glmm models with survival (from egg to larva, from larva to adult and from egg to adult, respectively) as the binomially distributed response variable, with sibling family as random factor and logit as link function. These models were run separately for each cross type (pure line/hybrid) and generation ( $F_1/F_2$ ). By and large, these analyses revealed no or minor differences among hybrid lines (see results in the main manuscript, Table S5 and Fig. S2).

As an additional measure of fitness, we tested the adult dry-weights from a sample of adults from each generation. These data was not possible to transform to fit the linear model assumptions, and hence, we performed non-parametric Kruskal Wallis ANOVAs to evaluate differences among cross types (pure/hybrid) generations ( $F_1$ - $F_3$ ) and sexes (a total of 10 groups).

**Chromosomal analysis.** Only fresh adult males were used to analyse meiosis and to study meiotic karyotype. Adults were killed by a sharp pinch to the thorax and testes were immediately excised and placed into 0.5-mL vials with freshly prepared Carnoy fixative (ethanol and glacial acetic acid, 3:1). Gonads were stored in fixative for 2–6 months at 4 °C and then stained with 2% acetic orcein for 30 days at 20 °C. Cytogenetic analysis was conducted using a two-phase method as previously described (10). In the first phase, the stained testes were placed into a drop of 40% lactic acid on a slide, the gonad membranes were torn apart using fine needles and intact spermatocysts were removed and transferred into another drop of 40% lactic acid. Intact spermatocysts were studied and photographed. The first phase was most useful for counting the number of chromosome bivalents, multivalents and univalents. In the second phase, different stages of chromosome spreading were studied using a slight, gradually growing pressure on the coverslip. The second phase was most useful for studying the chromosome structure and distinguishing between uni-, bi- and multivalents.

**FISH with 18S rDNA probe.** Testes of  $F_1$  hybrids were dissected and placed into freshly prepared Carnoy fixative (ethanol: glacial acetic acid, 3:1) overnight. Then the testes were squashed on slides

using the two-phase method as stated above, the coverslips were flicked off with a razor blade, and the slides were passed through a graded ethanol series (70%, 80%, and 100%, 1 min each).

Unlabelled 18S rDNA probe was generated by PCR from *Cydia pomonella* (Tortricidae) genomic DNA as described previously (11). The probe was labelled with biotin-16 dUTP (Roche Diagnostics GmbH, Mannheim, Germany) by nick translation using the Nick Translation Kit (Abbott Molecular Inc., Des Plaines, IL, USA) with 1 hour and 45 minutes incubation at 15 °C. FISH with the 18S rDNA probe was carried out using a routine protocol (11). Biotin was detected with Cy3-conjugated streptavidin (Jackson ImmunoRes. Labs. Inc., West Grove, PA, USA), amplified with biotinylated anti-streptavidin (Vector Labs. Inc., Burlingame, CA, USA) and again detected with Cy3-conjugated streptavidin. The preparations were counterstained with 0.5 mg/mL DAPI and mounted in antifade based on DABCO (Sigma-Aldrich, St. Louis, MO, USA). Immediately thereafter, the FISH preparations were observed under a Zeiss Axioplan 2 fluorescence microscope (Carl Zeiss Jena, Germany) to minimize background noise caused by the presence of excessive cytoplasm. Black-and-white images were captured separately for each fluorescent dye using an Olympus CCD monochrome camera XM10 equipped with cellSens 1.9 digital imaging software (Olympus Europa Holding, Hamburg, Germany), pseudocolored (light blue for DAPI, red for Cy3) and superimposed with Adobe Photoshop, version 7.0.

## References

1. Dincă V, Lukhtanov AV, Talavera G, Vila R (2011) Unexpected layers of cryptic diversity in Wood White *Leptidea* butterflies. *Nat Commun* 2:324.
2. Dincă V, Wiklund C, Lukhtanov VA, Kodandaramaiah U, Norén K, Dapporto L, Wahlberg N, Vila R, Friberg M (2013) Reproductive isolation and patterns of genetic differentiation in a cryptic butterfly species complex. *J Evol Biol* 26:2095-2106.
3. Lukhtanov VA, Dincă V, Talavera G, Vila R (2011) Unprecedented within-species chromosome number cline in the Wood White butterfly *Leptidea sinapis* and its significance for karyotype evolution and speciation. *BMC Evol Biol* 11:109.
4. Friberg M, Vongvanich N, Borg-Karlson A-K, Kemp DJ, Merilaita S, Wiklund C (2008) Female mate choice determines reproductive isolation between sympatric butterflies. *Behav Ecol Sociobiol* 62:873-886.

5. Wiklund C (1977) Courtship behaviour in relation to female monogamy in *Leptidea sinapis* (Lepidoptera). *Oikos* 29:275-283.
6. Freese A, Fiedler K (2002) Experimental evidence for species distinctness of the two wood white butterfly taxa, *Leptidea sinapis* and *L. reali* (Pieridae). *Nota Lepid* 25:39-59 (2002).
7. Friberg M, Olofsson M, Berger D, Karlsson B, Wiklund C (2008) Habitat choice precedes host plant choice – niche separation in a species-pair of a generalist and a specialist butterfly. *Oikos* 117:1337-1344.
8. Bates D, Maechler M, Bolker B, Walker S (2015) Fitting linear mixed-effects models using lme4. *J. Stat Software* 67:1-48.
9. Fox J, Weisberg S (2011) *An {R} companion to applied regression, second edition*. Sage, Thousand Oaks, California)
10. Lukhtanov VA, Dantchenko AV (2002) Principles of highly ordered metaphase I bivalent arrangement in spermatocytes of *Agrodiaetus* (Lepidoptera). *Chromosome Res* 10:5–20.
11. Fuková I, Nguyen P, Marec F (2005) Codling moth cytogenetics: karyotype, chromosomal location of rDNA and molecular differentiation of sex chromosomes. *Genome* 48:1083–1092.

## SI Text 1

The reduced viability of  $F_2$ ,  $F_3$  and  $F_4$  generations in hybrid lines may be caused by mal-segregation of trivalents in spermatogenesis of  $F_1$ ,  $F_2$  and  $F_3$  males, respectively, as well as by mal-segregation of trivalents in oogenesis of  $F_1$ ,  $F_2$  and  $F_3$  females. These relative effects of spermatogenesis and oogenesis on reduced fitness in hybrid lines could be tested by comparing the viability of offspring from [ $F_1$  male] x [pure-control-line female] backcrosses with the viability of offspring from [ $F_1$  female] x [pure-control-line male] backcrosses (and similarly for  $F_2$  males vs  $F_2$  females, etc.). We have not carried out these backcrosses because this would require a different crossing scheme that is outside the main scope of this study. Nevertheless, they can be done in the future. In addition, despite the absence of backcross data, it is highly probable that mal-segregation in spermatogenesis (but not in oogenesis) is the main reason for reduced viability because in Lepidoptera, females have achiasmatic meiosis and a special organization of bi- and multivalents that reduces unbalanced segregation (explained in the main text).

## SI Text 2

The equatorial orientation at metaphase I with the subsequent equational division (inverted meiosis) is not an indispensable condition for proper segregation of a holocentric trivalent. If the trivalent can bend sufficiently at metaphase I, it can form the U-shaped structure with a larger chromosome towards one spindle pole and with two smaller chromosomes towards the opposite pole. In that case, the axial orientation at metaphase I followed by reductional division (i.e. standard sequence of the main meiotic events) is the best option for proper segregation, and exactly this pattern was predominantly observed in the U-shaped sex chromosome trivalents of a holocentric homopteran species, *Cacopsylla mali* (see the reference 38 in the main text).

The comparison between trivalents of *L. sinapis* and *C. mali* indicated that sometimes axial orientation is better at metaphase I and sometimes equatorial alignment is better for subsequent segregation. It likely depends on the “bendability” of the trivalent, i.e., whether it can bend sufficiently at metaphase I to form the “U” shaped structure required for proper segregation of two small chromosomes in one direction and one large chromosome in the opposite direction, or whether this bendability is achieved at metaphase II instead.

Thus, there is a clear flexibility of holocentric organisms in terms of equatorial or axial orientation at metaphase I, which suggests an intrinsic versatility of holocentric chromosomes in dealing with chromosomal rearrangements at meiosis. This is not an option available to monocentric organisms.

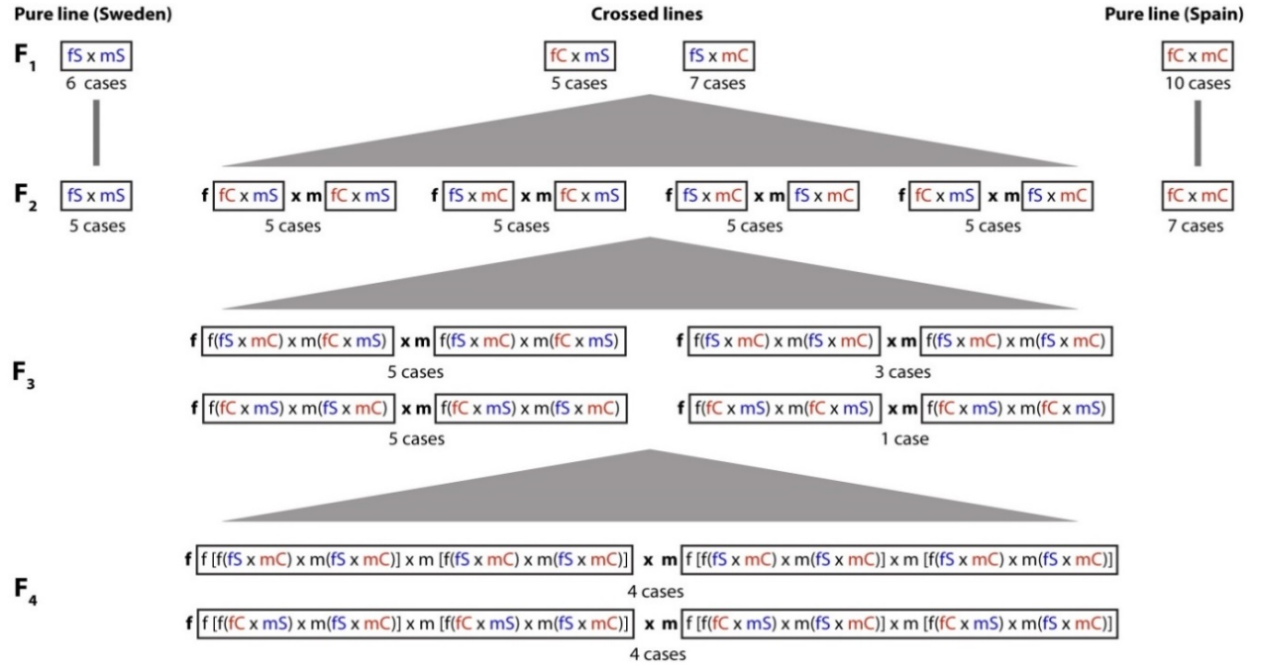

**Fig. S1.** Mating combinations between chromosomal races of *Leptidea sinapis*: Spain (C,  $2n=106,108$ ) and Sweden (S,  $2n=57, 58$ ). All mating combinations were performed until  $F_2$  with pure lines serving as controls for  $F_1$  and  $F_2$  hybrid fitness. Several hybrid combinations were maintained through generation  $F_3$ , and  $F_4$ . The number of successful matings is indicated for each case.

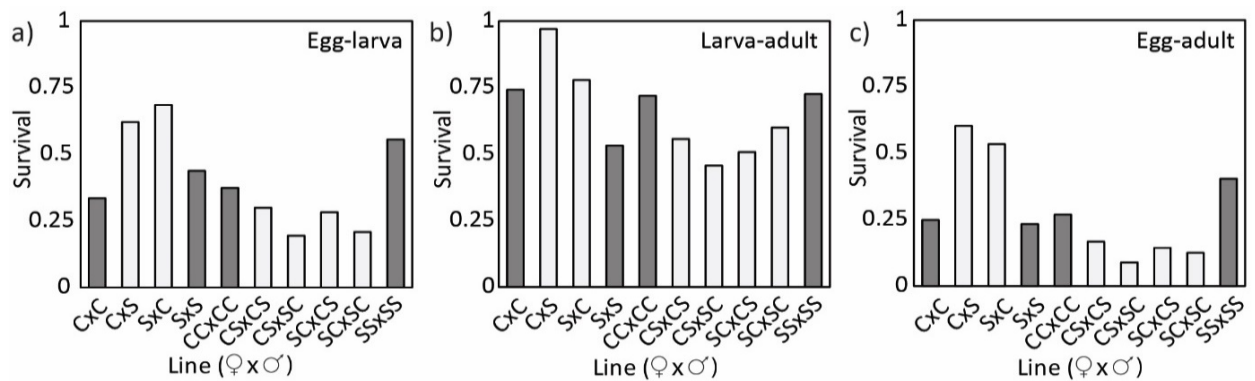

**Fig. S2.** Proportional survival of the progeny of *Leptidea sinapis* crosses between Spanish (C) and Swedish (S) chromosomal races from (a) egg to larva, (b) larva to adult, and (c) egg to adult for each of the crosses applied in  $F_1$  and  $F_2$ . Dark grey bars indicate pure lines, and light grey bars indicate hybrid lines.

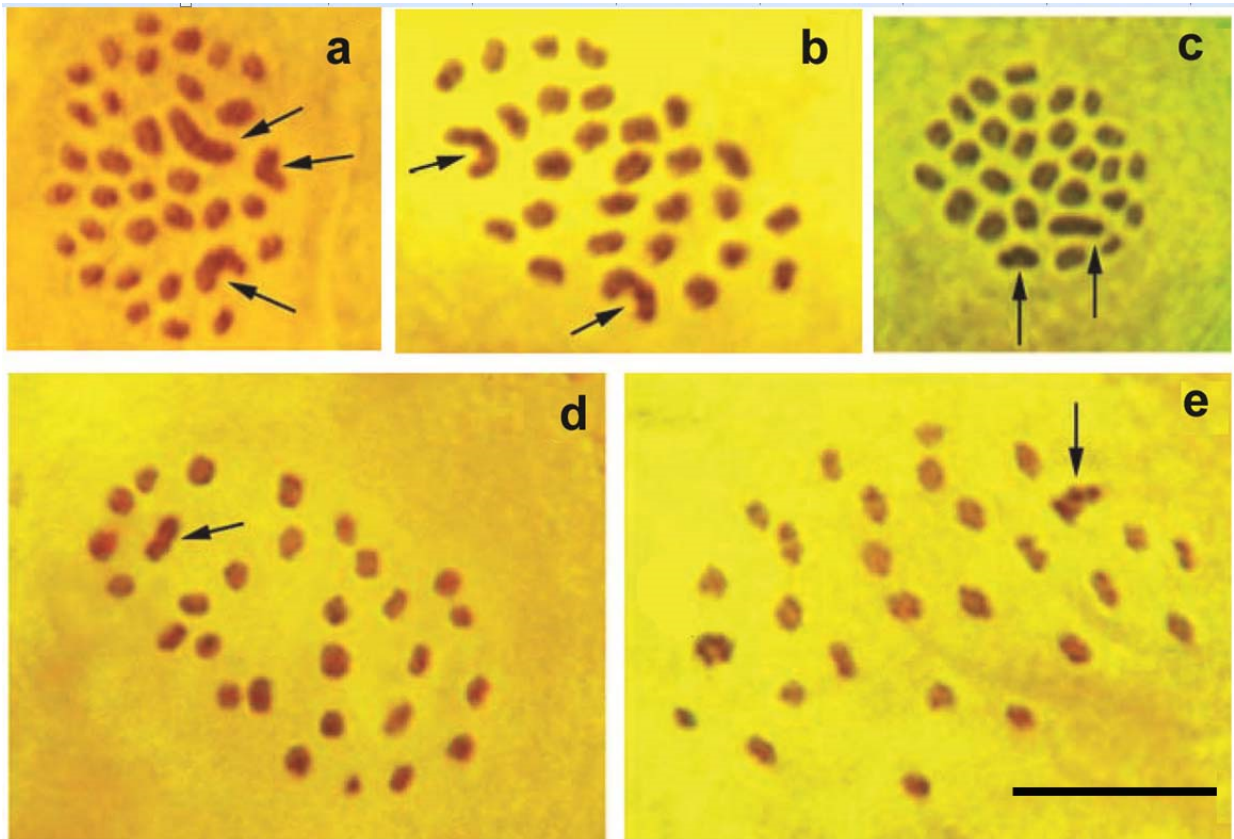

**Fig. S3.** Metaphase I plates of *Leptidea sinapis* with bivalents and trivalents. Arrows indicate trivalents. Scale bar corresponds to 10  $\mu\text{m}$  in all figures. (a-d) Intact or weakly squashed metaphase plates, view from pole. All bivalents are oriented parallel to the spindle fibers, while trivalents lie in the equatorial plane and oriented transversely to the spindle fibers. (e) Squashed metaphase plate. The bivalents are oriented parallel to the spindle fibers, while the trivalent is oriented transversely to the spindle fibers. (a) Romania, RVcoll07E366,  $n=34$ . (b) Kazakhstan, RVcoll06H638,  $n=28$ . (c) Kazakhstan, RVcoll07Z236,  $n=28$ . (d) Kazakhstan, RVcoll06H640,  $n=29$ . (e) Kazakhstan, RVcoll07Z236,  $n=28$ .

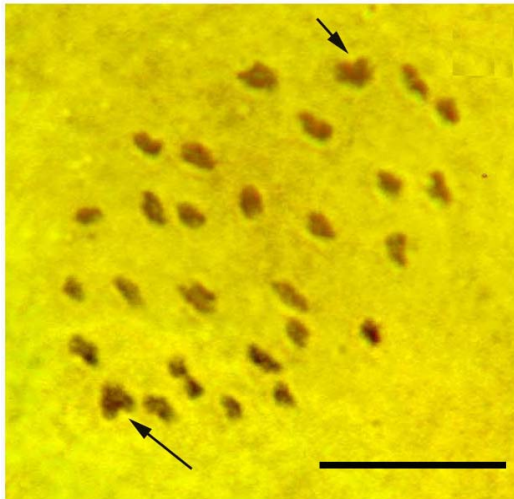

**Fig. S4.** Metaphase II plates of *Leptidea sinapis* with bivalents and trivalents. Arrows indicate trivalents. The trivalents are U-shaped and co-oriented, i.e. the larger homolog is oriented towards one pole, while two smaller homologs are oriented towards the opposite pole. Scale bar corresponds to 10  $\mu\text{m}$ . Kazakhstan, RVcoll06H631, MII cell showing 28 chromosome elements.

**Table S1.** Male specimens of *Leptidea sinapis* used for karyological analyses.

| Sample ID | Studied as | Line type                             | Chromosome number |
|-----------|------------|---------------------------------------|-------------------|
| L1        | larva      | pure lab line Spain                   | 2n=106            |
| L2        | larva      | pure lab line Spain                   | 2n=108            |
| L3        | larva      | pure lab line Sweden                  | 2n=57             |
| L4        | larva      | pure lab line Sweden                  | 2n=58             |
| 12M060    | adult      | pure line Sweden                      | n=27              |
| 12M058    | adult      | pure line Sweden                      | n=27+trivalent    |
| 12M049    | adult      | pure line Sweden                      | n=29              |
| 12Z085    | adult      | pure line Sweden                      | n=29              |
| 10-B467   | adult      | pure line Sweden                      | n=29, 2n=ca59     |
| 12-M050   | adult      | pure line Sweden                      | no cell divisions |
| 12-M052   | adult      | pure line Sweden                      | no cell divisions |
| 12-M053   | adult      | pure line Sweden                      | no cell divisions |
| 12-Z091   | adult      | pure line Sweden                      | no cell divisions |
| 12-Z093   | adult      | pure line Sweden                      | no cell divisions |
| 12M054    | adult      | pure line Sweden                      | no cell divisions |
| 12M055    | adult      | pure line Sweden                      | no cell divisions |
| 12M056    | adult      | pure line Sweden                      | no cell divisions |
| 12M057    | adult      | pure line Sweden                      | no cell divisions |
| 12M059    | adult      | pure line Sweden                      | no cell divisions |
| 12M061    | adult      | pure line Sweden                      | no cell divisions |
| 12M062    | adult      | pure line Sweden                      | no cell divisions |
| 12Z086    | adult      | pure line Sweden                      | no cell divisions |
| 12Z087    | adult      | pure line Sweden                      | no cell divisions |
| 12Z088    | adult      | pure line Sweden                      | no cell divisions |
| 12Z089    | adult      | pure line Sweden                      | no cell divisions |
| 12Z090    | adult      | pure line Sweden                      | no cell divisions |
| 12Z092    | adult      | pure line Sweden                      | no cell divisions |
| 10-B466   | adult      | pure line Sweden                      | no result         |
| 13Y025    | adult      | F <sub>1</sub> hybrid, Spain x Sweden | 2n=82             |
| 13Y037    | adult      | F <sub>1</sub> hybrid, Spain x Sweden | 2n=82             |
| 13Y050    | adult      | F <sub>1</sub> hybrid, Spain x Sweden | 2n=82             |
| 13Y039    | adult      | F <sub>1</sub> hybrid, Spain x Sweden | 2n=82             |
| 13Y058    | adult      | F <sub>1</sub> hybrid, Spain x Sweden | n=28              |
| 12-Z065   | adult      | F <sub>1</sub> hybrid, Spain x Sweden | n=28-31           |
| 13Y045    | adult      | F <sub>1</sub> hybrid, Spain x Sweden | n=29              |
| 13Y057    | adult      | F <sub>1</sub> hybrid, Spain x Sweden | n=29              |
| 13Y063    | adult      | F <sub>1</sub> hybrid, Spain x Sweden | n=29              |
| 12-Z066   | adult      | F <sub>1</sub> hybrid, Spain x Sweden | n=29-32           |
| 12-Z051   | adult      | F <sub>1</sub> hybrid, Spain x Sweden | n=30-32           |
| 12-Z054   | adult      | F <sub>1</sub> hybrid, Spain x Sweden | n=30-33           |
| 12-Z048   | adult      | F <sub>1</sub> hybrid, Spain x Sweden | no cell divisions |
| 12-Z055   | adult      | F <sub>1</sub> hybrid, Spain x Sweden | no cell divisions |
| 12-Z057   | adult      | F <sub>1</sub> hybrid, Spain x Sweden | no cell divisions |
| 12-Z067   | adult      | F <sub>1</sub> hybrid, Spain x Sweden | no cell divisions |
| 12-Z073   | adult      | F <sub>1</sub> hybrid, Spain x Sweden | no cell divisions |
| 13Y023    | adult      | F <sub>1</sub> hybrid, Spain x Sweden | no cell divisions |
| 13Y024    | adult      | F <sub>1</sub> hybrid, Spain x Sweden | no cell divisions |
| 13Y029    | adult      | F <sub>1</sub> hybrid, Spain x Sweden | no cell divisions |
| 13Y030    | adult      | F <sub>1</sub> hybrid, Spain x Sweden | no cell divisions |
| 13Y036    | adult      | F <sub>1</sub> hybrid, Spain x Sweden | no cell divisions |
| 13Y043    | adult      | F <sub>1</sub> hybrid, Spain x Sweden | no cell divisions |
| 13Y047    | adult      | F <sub>1</sub> hybrid, Spain x Sweden | no cell divisions |
| 13Y048    | adult      | F <sub>1</sub> hybrid, Spain x Sweden | no cell divisions |

| <b>Sample ID</b> | <b>Studied as</b> | <b>Line type</b>                      | <b>Chromosome number</b>      |
|------------------|-------------------|---------------------------------------|-------------------------------|
| 13Y060           | adult             | F <sub>1</sub> hybrid, Spain x Sweden | no cell divisions             |
| 13Y026           | adult             | F <sub>1</sub> hybrid, Spain x Sweden | no cell divisions             |
| 13Y027           | adult             | F <sub>1</sub> hybrid, Spain x Sweden | no cell divisions             |
| 13Y028           | adult             | F <sub>1</sub> hybrid, Spain x Sweden | no cell divisions             |
| 13Y031           | adult             | F <sub>1</sub> hybrid, Spain x Sweden | no cell divisions             |
| 13Y032           | adult             | F <sub>1</sub> hybrid, Spain x Sweden | no cell divisions             |
| 13Y033           | adult             | F <sub>1</sub> hybrid, Spain x Sweden | no cell divisions             |
| 13Y034           | adult             | F <sub>1</sub> hybrid, Spain x Sweden | no cell divisions             |
| 13Y035           | adult             | F <sub>1</sub> hybrid, Spain x Sweden | no cell divisions             |
| 13Y038           | adult             | F <sub>1</sub> hybrid, Spain x Sweden | no cell divisions             |
| 13Y040           | adult             | F <sub>1</sub> hybrid, Spain x Sweden | no cell divisions             |
| 13Y041           | adult             | F <sub>1</sub> hybrid, Spain x Sweden | no cell divisions             |
| 13Y042           | adult             | F <sub>1</sub> hybrid, Spain x Sweden | no cell divisions             |
| 13Y044           | adult             | F <sub>1</sub> hybrid, Spain x Sweden | no cell divisions             |
| 13Y046           | adult             | F <sub>1</sub> hybrid, Spain x Sweden | no cell divisions             |
| 13Y049           | adult             | F <sub>1</sub> hybrid, Spain x Sweden | no cell divisions             |
| 13Y056           | adult             | F <sub>1</sub> hybrid, Spain x Sweden | no cell divisions             |
| 13Y059           | adult             | F <sub>1</sub> hybrid, Spain x Sweden | no cell divisions             |
| 13Y061           | adult             | F <sub>1</sub> hybrid, Spain x Sweden | no cell divisions             |
| 13Y062           | adult             | F <sub>1</sub> hybrid, Spain x Sweden | no cell divisions             |
| 13Y064           | adult             | F <sub>1</sub> hybrid, Spain x Sweden | no cell divisions             |
| L5               | larva             | F <sub>2</sub> hybrid, Spain x Sweden | 2n > 80, unknown exact number |
| L6               | larva             | F <sub>2</sub> hybrid, Spain x Sweden | 2n > 80, unknown exact number |
| L7               | larva             | F <sub>2</sub> hybrid, Spain x Sweden | 2n=73, approximate            |
| L8               | larva             | F <sub>2</sub> hybrid, Spain x Sweden | 2n=77, approximate            |
| L9               | larva             | F <sub>2</sub> hybrid, Spain x Sweden | 2n=77, approximate            |
| L10              | larva             | F <sub>2</sub> hybrid, Spain x Sweden | 2n=82, approximate            |
| L11              | larva             | F <sub>2</sub> hybrid, Spain x Sweden | 2n=82, approximate            |
| L12              | larva             | F <sub>2</sub> hybrid, Spain x Sweden | 2n=83                         |
| L13              | larva             | F <sub>2</sub> hybrid, Spain x Sweden | 2n=83                         |
| L14              | larva             | F <sub>2</sub> hybrid, Spain x Sweden | 2n=83                         |
| L15              | larva             | F <sub>2</sub> hybrid, Spain x Sweden | 2n=85                         |
| L16              | larva             | F <sub>2</sub> hybrid, Spain x Sweden | 2n=90                         |
| 13Y080           | larva             | F <sub>2</sub> hybrid, Spain x Sweden | n=31                          |
| 11-H440          | adult             | F <sub>2</sub> hybrid, Spain x Sweden | n=31-32 in MI                 |
| 13Y079           | larva             | F <sub>2</sub> hybrid, Spain x Sweden | n=32                          |
| 13Y082           | larva             | F <sub>2</sub> hybrid, Spain x Sweden | n=32                          |
| 11-H437          | adult             | F <sub>2</sub> hybrid, Spain x Sweden | n=32 in MI                    |
| 13Y084           | larva             | F <sub>2</sub> hybrid, Spain x Sweden | n=32, 33                      |
| 13Y083           | larva             | F <sub>2</sub> hybrid, Spain x Sweden | n=33                          |
| 11-H479          | adult             | F <sub>2</sub> hybrid, Spain x Sweden | n=35 in MI                    |
| 13Y077           | larva             | F <sub>2</sub> hybrid, Spain x Sweden | n=35, 36                      |
| 11-H467          | adult             | F <sub>2</sub> hybrid, Spain x Sweden | n=35?                         |
| 13Y081           | larva             | F <sub>2</sub> hybrid, Spain x Sweden | n=36                          |
| 11-H439          | adult             | F <sub>2</sub> hybrid, Spain x Sweden | n=37? or n=34                 |
| 11-H447          | adult             | F <sub>2</sub> hybrid, Spain x Sweden | no divisions                  |
| 11-H451          | adult             | F <sub>2</sub> hybrid, Spain x Sweden | no divisions                  |
| 11-H460          | adult             | F <sub>2</sub> hybrid, Spain x Sweden | no divisions                  |
| 11-H461          | adult             | F <sub>2</sub> hybrid, Spain x Sweden | no divisions                  |
| 11-H475          | adult             | F <sub>2</sub> hybrid, Spain x Sweden | no divisions                  |
| 13Y078           | larva             | F <sub>2</sub> hybrid, Spain x Sweden | no results                    |
| L17              | larva             | F <sub>3</sub> hybrid, Spain x Sweden | 2n > 80, unknown exact number |
| L18              | larva             | F <sub>3</sub> hybrid, Spain x Sweden | 2n= 95 or 96                  |
| L19              | larva             | F <sub>3</sub> hybrid, Spain x Sweden | 2n= 96, approximate           |
| L20              | larva             | F <sub>3</sub> hybrid, Spain x Sweden | 2n=76                         |
| L21              | larva             | F <sub>3</sub> hybrid, Spain x Sweden | 2n=76                         |

| <b>Sample ID</b> | <b>Studied as</b> | <b>Line type</b>                      | <b>Chromosome number</b> |
|------------------|-------------------|---------------------------------------|--------------------------|
| L22              | larva             | F <sub>3</sub> hybrid, Spain x Sweden | 2n=77                    |
| L23              | larva             | F <sub>3</sub> hybrid, Spain x Sweden | 2n=86                    |
| 14A002           | larva             | F <sub>3</sub> hybrid, Spain x Sweden | n=29                     |
| 14A004           | larva             | F <sub>3</sub> hybrid, Spain x Sweden | n=29                     |
| 14A003           | larva             | F <sub>3</sub> hybrid, Spain x Sweden | n=31                     |
| 14A001           | larva             | F <sub>3</sub> hybrid, Spain x Sweden | n=32                     |
| 14A000           | larva             | F <sub>3</sub> hybrid, Spain x Sweden | n=33                     |
| 14A005           | larva             | F <sub>3</sub> hybrid, Spain x Sweden | n=35                     |
| 14A006           | larva             | F <sub>3</sub> hybrid, Spain x Sweden | no meiotic divisions     |
| 14B000           | larva             | F <sub>4</sub> hybrid, Spain x Sweden | n=32                     |
| 14B003           | larva             | F <sub>4</sub> hybrid, Spain x Sweden | n=33                     |
| 14B004           | larva             | F <sub>4</sub> hybrid, Spain x Sweden | n=33                     |
| 14B002           | larva             | F <sub>4</sub> hybrid, Spain x Sweden | n=34                     |
| 14B005           | larva             | F <sub>4</sub> hybrid, Spain x Sweden | n=37                     |
| 14B001           | larva             | F <sub>4</sub> hybrid, Spain x Sweden | n=38                     |

**Table S2.** Sample sizes of *Leptidea sinapis* families used for survival analyses

| <b>Cross type</b> | <b>Generation</b>    | <b>Sample size (families)</b> |               |               |
|-------------------|----------------------|-------------------------------|---------------|---------------|
|                   |                      | <b>eggs</b>                   | <b>larvae</b> | <b>adults</b> |
| <b>Pure</b>       | <b>F<sub>1</sub></b> | 373 (16)                      | 143 (16)      | 87 (16)       |
| <b>Hybrid</b>     | <b>F<sub>1</sub></b> | 286 (12)                      | 189 (12)      | 160 (12)      |
| <b>Pure</b>       | <b>F<sub>2</sub></b> | 767 (12)                      | 362 (12)      | 262 (12)      |
| <b>Hybrid</b>     | <b>F<sub>2</sub></b> | 908 (20)                      | 225 (17)      | 121 (15)      |
| <b>Hybrid</b>     | <b>F<sub>3</sub></b> | 371 (14)                      | 110 (8)       | 69 (7)        |
| <b>Hybrid</b>     | <b>F<sub>4</sub></b> | 204 (7)                       | 70 (6)        | 43 (4)        |

**Table S3.** Statistical output of linear models (ANOVA II) testing the impact of cross type (pure-/hybrid) and offspring generation (F<sub>1</sub>/F<sub>2</sub>) in *Leptidea sinapis* on survival between life stages (fitness), on the offspring sex ratio and on the female fecundity. Significant results are indicated in bold.

|                                  | Survival egg-larva |          |                  | Survival larva-adult |          |                  | Survival egg-adult |          |                  | Sex ratio |          |          | Fecundity |          |                  |
|----------------------------------|--------------------|----------|------------------|----------------------|----------|------------------|--------------------|----------|------------------|-----------|----------|----------|-----------|----------|------------------|
|                                  | <i>df</i>          | <i>F</i> | <i>P</i>         | <i>df</i>            | <i>F</i> | <i>P</i>         | <i>df</i>          | <i>F</i> | <i>P</i>         | <i>df</i> | <i>F</i> | <i>P</i> | <i>df</i> | <i>F</i> | <i>P</i>         |
| <b>Cross Type (CT)</b>           | 1                  | 0.56     | 0.45             | 1                    | 0.18     | 0.68             | 1                  | 0.10     | 0.75             | 1         | 0.24     | 0.63     | 1         | 0.36     | 0.63             |
| <b>Offspring Generation (OG)</b> | 1                  | 19.4     | <b>&lt;0.001</b> | 1                    | 7.49     | <b>0.008</b>     | 1                  | 21.2     | <b>&lt;0.001</b> | 1         | 1.18     | 0.28     | 1         | 18.5     | <b>&lt;0.001</b> |
| <b>CT * OG</b>                   | 1                  | 10.5     | <b>&lt;0.001</b> | 1                    | 14.9     | <b>&lt;0.001</b> | 1                  | 24.7     | <b>&lt;0.001</b> | 1         | 0.003    | 0.96     | 1         | 2.19     | 0.14             |
| <b>Error</b>                     | 56                 |          |                  | 54                   |          |                  | 56                 |          |                  | 52        |          |          | 56        |          |                  |

**Table S4.** Impact of *Leptidea sinapis* sibling crosses on survival. There were no significant differences in survival between offspring from sibling crosses and offspring from non-related crosses (ANOVA II).

|                                   | Survival egg-larva |          |          | Survival larva-adult |          |          | Survival egg-adult |          |          |
|-----------------------------------|--------------------|----------|----------|----------------------|----------|----------|--------------------|----------|----------|
|                                   | <i>df</i>          | <i>F</i> | <i>P</i> | <i>df</i>            | <i>F</i> | <i>P</i> | <i>df</i>          | <i>F</i> | <i>P</i> |
| <b>Cross (sibling/outcrossed)</b> | 1                  | 0.15     | 0.70     | 1                    | 1.39     | 0.25     | 1                  | 0.14     | 0.71     |
| <b>Error</b>                      | 26                 |          |          | 26                   |          |          | 26                 |          |          |

**Table S5.** Statistical output (Analysis of deviance) of generalized mixed logistic regression models testing the impact of larval cross type within each generation on survival between life stages (fitness) of *Leptidea sinapis*. Analysis was made in separate models for pure lines and for hybrid lines. Significant effects are indicated in bold font. In the pure lines of generation F<sub>1</sub>, 75% of the larvae from Spain x Spain crosses survived from larva to adult, as compared with 53% of the Sweden x Sweden crosses, and in the hybrid lines of the same generation 97% of the larvae of the Spain x Sweden cross survived until adulthood, whereas 78% of larvae in the Sweden x Spain cross eclosed as adults. These were the only significant differences (see also Fig. S3).

| Cross/Generation      | Egg-larva |    |      | : | Larva-adult |    |              | : | Egg-adult |    |      |
|-----------------------|-----------|----|------|---|-------------|----|--------------|---|-----------|----|------|
|                       | $\chi^2$  | df | P    |   | $\chi^2$    | df | P            |   | $\chi^2$  | df | P    |
| Pure/F <sub>1</sub>   | 3.3       | 1  | 0.07 | : | 4.33        | 1  | <b>0.037</b> | : | 0.46      | 1  | 0.50 |
| Hybrid/F <sub>1</sub> | 0.2       | 1  | 0.67 | : | 7.25        | 1  | <b>0.007</b> | : | 0.11      | 1  | 0.74 |
| Pure/F <sub>2</sub>   | 2.5       | 1  | 0.12 | : | 2.61*       | 1  | 0.27         | : | 2.30      | 1  | 0.13 |
| Hybrid/F <sub>2</sub> | 1.2       | 3  | 0.75 | : | 1.58        | 3  | 0.66         | : | 5.90*     | 3  | 0.12 |

\*these models either failed to converge with max|grad| or included non-uniquely determined parameters, indicating unsuitable data structure for the glmer analysis. Instead, these data were tested in generalized linear models (glm) not including family as random factor.

**Table S6.** Statistical output of general linear models (ANOVA II) testing the impact of hybrid offspring generation (F<sub>1</sub>-F<sub>4</sub>) on survival between life stages (fitness) of *Leptidea sinapis*, on the offspring sex ratio, and on female fecundity (parental crosses, and crosses in generation F<sub>1</sub>-F<sub>3</sub>). Significant effects are indicated in bold font. Post-hoc significant testing was obtained through Tukey's HSD test (see also Fig. 2).

|                   | Egg-larva |      |                  | Larva-adult |     |              | Egg-adult |      |                  | Sex ratio |      |      | Fecundity |      |       |
|-------------------|-----------|------|------------------|-------------|-----|--------------|-----------|------|------------------|-----------|------|------|-----------|------|-------|
|                   | df        | F    | P                | df          | F   | P            | df        | F    | P                | df        | F    | P    | df        | F    | P     |
| Hybrid generation | 3         | 11.2 | <b>&lt;0.001</b> | 3           | 5.2 | <b>0.004</b> | 3         | 17.0 | <b>&lt;0.001</b> | 1         | 0.41 | 0.75 | 3         | 2.31 | 0.088 |
| Error             | 49        |      |                  | 40          |     |              | 49        |      |                  | 37        |      |      | 49        |      |       |

**Table S7.** Statistical output (Analysis of deviance) of generalized linear mixed models testing the impact of cross type (within-/between populations) and offspring generation (F<sub>1</sub>/F<sub>2</sub>) of *Leptidea sinapis* on survival between life stages (fitness) and on the offspring sex ratio. All models have family as random factor. Significant results are indicated in bold.

|                                  | Survival egg-larva |    |                  | Survival egg-adult |    |                  | Survival larva-adult |    |                  | Sex ratio |    |       |
|----------------------------------|--------------------|----|------------------|--------------------|----|------------------|----------------------|----|------------------|-----------|----|-------|
|                                  | $\chi^2$           | df | P                | $\chi^2$           | df | P                | $\chi^2$             | df | P                | $\chi^2$  | df | P     |
| <b>Cross Type (CT)</b>           | 1.3                | 1  | 0.25             | 0.46               | 1  | 0.5              | 0.012                | 1  | 0.97             | 0.68      | 1  | 0.41  |
| <b>Offspring Generation (OG)</b> | 16.2               | 1  | <b>&lt;0.001</b> | 18.8               | 1  | <b>&lt;0.001</b> | 6.2                  | 1  | <b>0.013</b>     | 3.6       | 1  | 0.078 |
| <b>CT * OG</b>                   | 12.9               | 1  | <b>&lt;0.001</b> | 25.8               | 1  | <b>&lt;0.001</b> | 16.8                 | 1  | <b>&lt;0.001</b> | 0.22      | 1  | 0.64  |

**Table S8.** Statistical output (Analysis of deviance) of generalized mixed logistic regression models testing the impact of offspring generation (F<sub>1</sub>-F<sub>4</sub>) on survival between life stages (fitness) and on the offspring sex ratio in the hybrid lines of *Leptidea sinapis*. Bottom section shows the output of similar linear models for adult dry weight (separate for males and females; generation F<sub>1</sub>-F<sub>3</sub>) and female fecundity (Parental crosses, and crosses in generation F<sub>1</sub>-F<sub>3</sub>). All models have family as random factor. Significant effects are indicated in bold.

| <b>Hybrid fitness</b> | $\chi^2$ | df | P                |
|-----------------------|----------|----|------------------|
| <b>Egg-larva</b>      | 25.1     | 3  | <b>&lt;0.001</b> |
| <b>Egg-adult</b>      | 37.6     | 3  | <b>&lt;0.001</b> |
| <b>Larva-adult</b>    | 21.9     | 3  | <b>&lt;0.001</b> |
| <b>Sex ratio</b>      | 3.46     | 3  | 0.33             |

**SI Video.** Courtship involving male and female *Leptidea sinapis* from north-eastern Spain (Catalonia).
